# Supplementary material
Source: publisher figshare collection journal article supplement (https://frontiersin.figshare.com/ndownloader/files/23102096)
Supplement: Supplementary file [file 23102096]

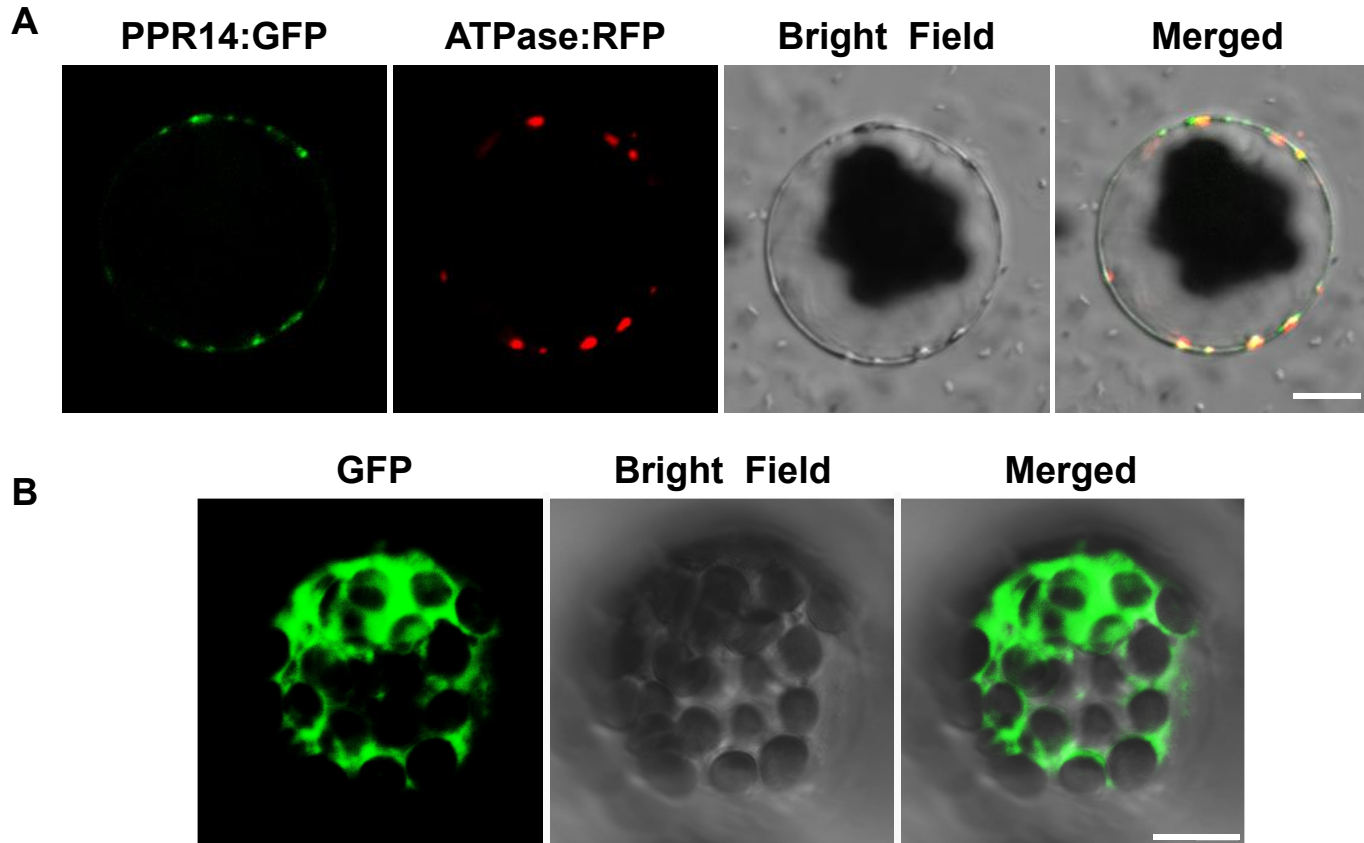

**Fig. S1.** Subcellular localization of PPR14 protein in Arabidopsis protoplasts. (A) Co-localization of GFP-tagged PPR14 and RFP-tagged mitochondrial marker protein F1-ATPase- $\gamma$ . PPR14-GFP fusion protein and ATPase-RFP fusion protein were transiently co-expressed in protoplasts of Arabidopsis leaves. Fluorescence signals from PPR14-GFP (green) and ATPase-RFP (red) were detected by a confocal laser microscope. (B) Subcellular localization of free GFP in mesophyll protoplasts of Arabidopsis. Bars = 10  $\mu$ m.

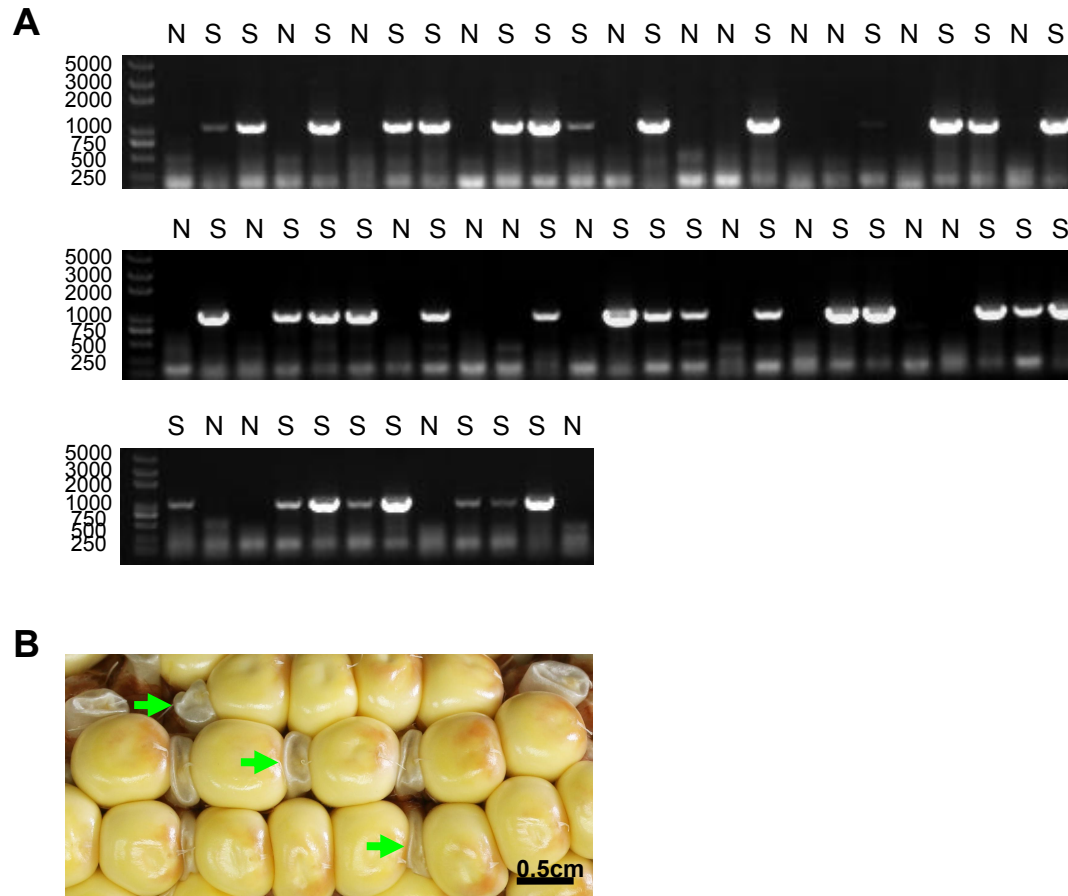

**Fig. S2.** *PPR14* linkage analysis. (A) Co-segregation analysis of a segregating population. 62 individual plants were genotyped by PCR amplification with 14-F2 and TIR8 primers at seedling stage. The PCR product at 1000 bp indicates the *Mu* insertion in *PPR14* gene. The phenotype of the individual selfed cobs was observed when they matured. N, nonsegregating (wild type); S, segregating (heterozygous *PPR14/ppr14*). (B) Cross between *ppr14-1* and *ppr14-2* produce ears segregating *empty pericarp* kernels (green arrows) at a 1:3 ratio (*emp*:WT).

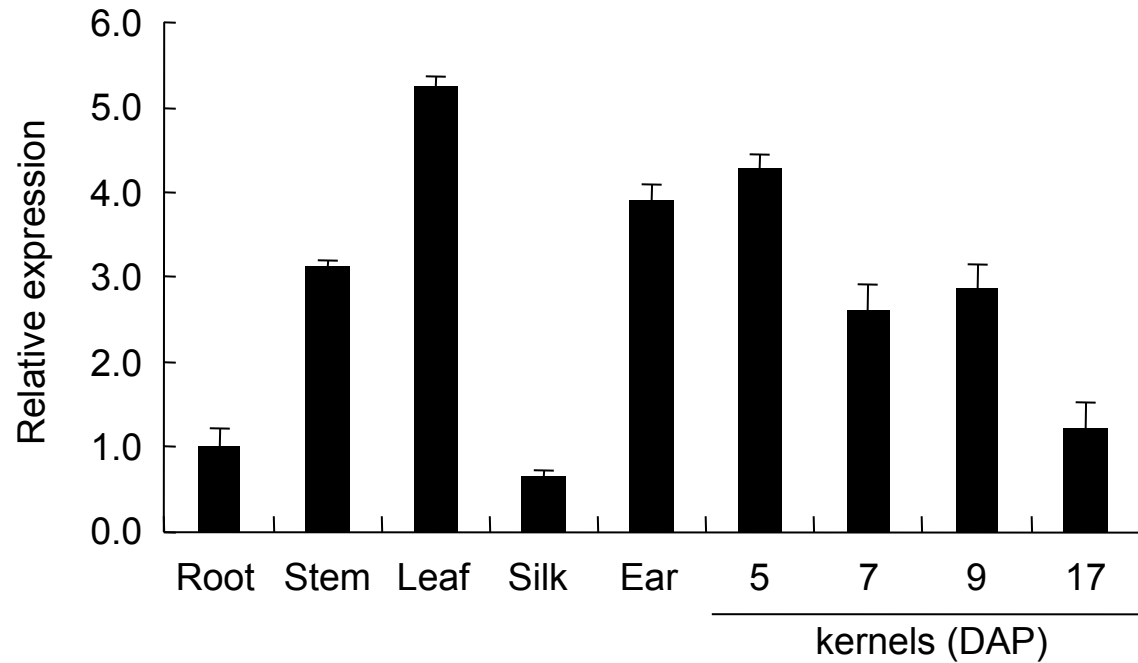

**Fig. S3.** *PPR14* expression in different tissues and developing kernels. *PPR14* expression in roots, stems, leaves, silk, ear, and kernels at different stages. *ZmEF1 $\alpha$*  was used to normalize the quantifications. Values and error bars represent the mean and standard deviation of three biological replicates, respectively.

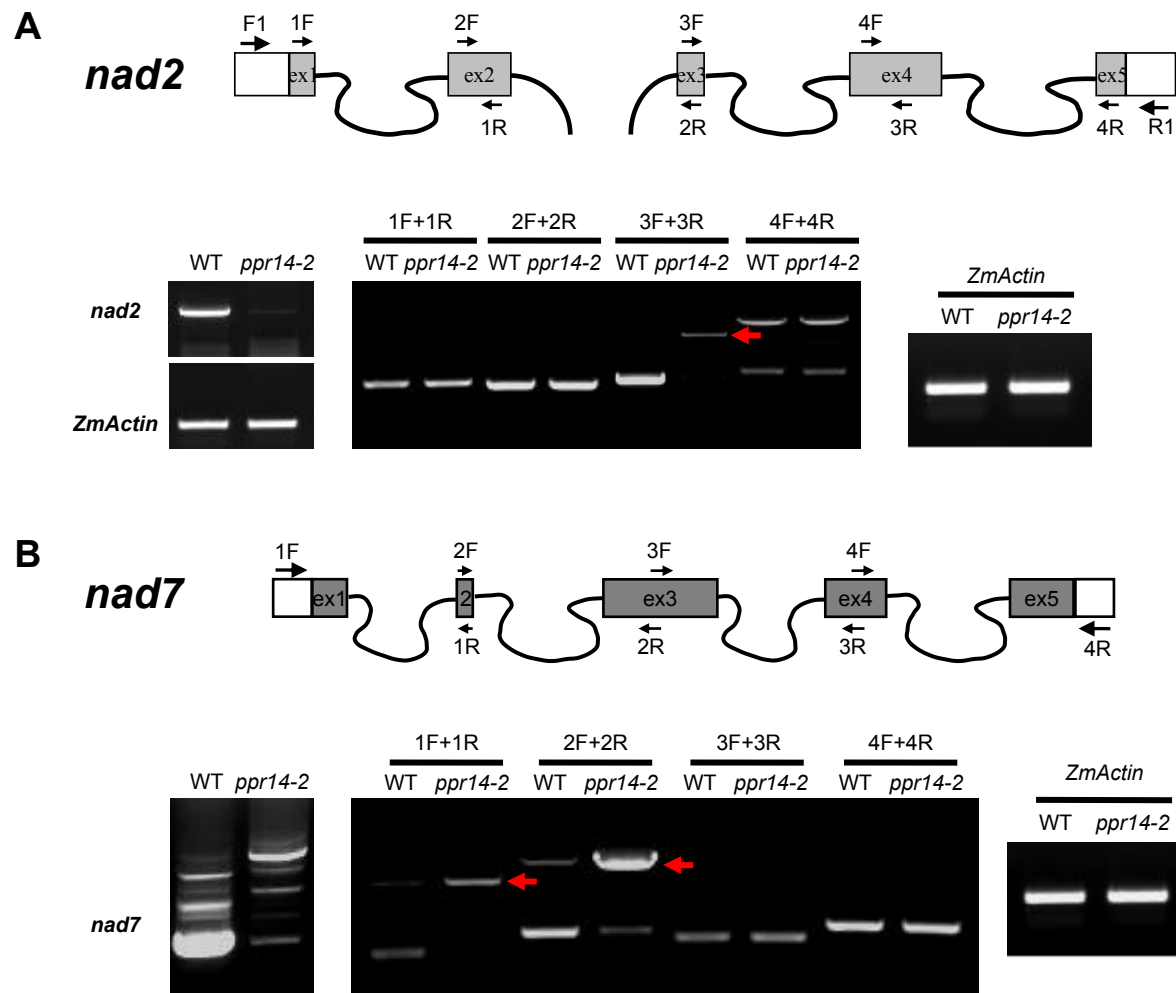

**Fig. S4.** Detailed analysis of *nad2* and *nad7* splicing in the *ppr14-2* mutant. (A) Gene structure and RT-PCR analysis of *nad2*. Exons are closed boxes and introns are lines. RT-PCR analysis of the *nad2* transcript in *ppr14-2* mutant and wild-type (WT) was performed using various combinations of the primers described above. Red arrow indicates the intron-containing products. The splicing of *nad2* intron 3 is nearly abolished in the *ppr14-2* mutant. (B) The *nad7* gene structure and RT-PCR analysis of the *nad7* transcript. The *nad7* gene has five exons that are joined by four *cis*-splicing events. Red arrows indicate the intron-containing products. *ppr14* mutation dramatically reduces splicing of *nad7* introns 1 and 2.

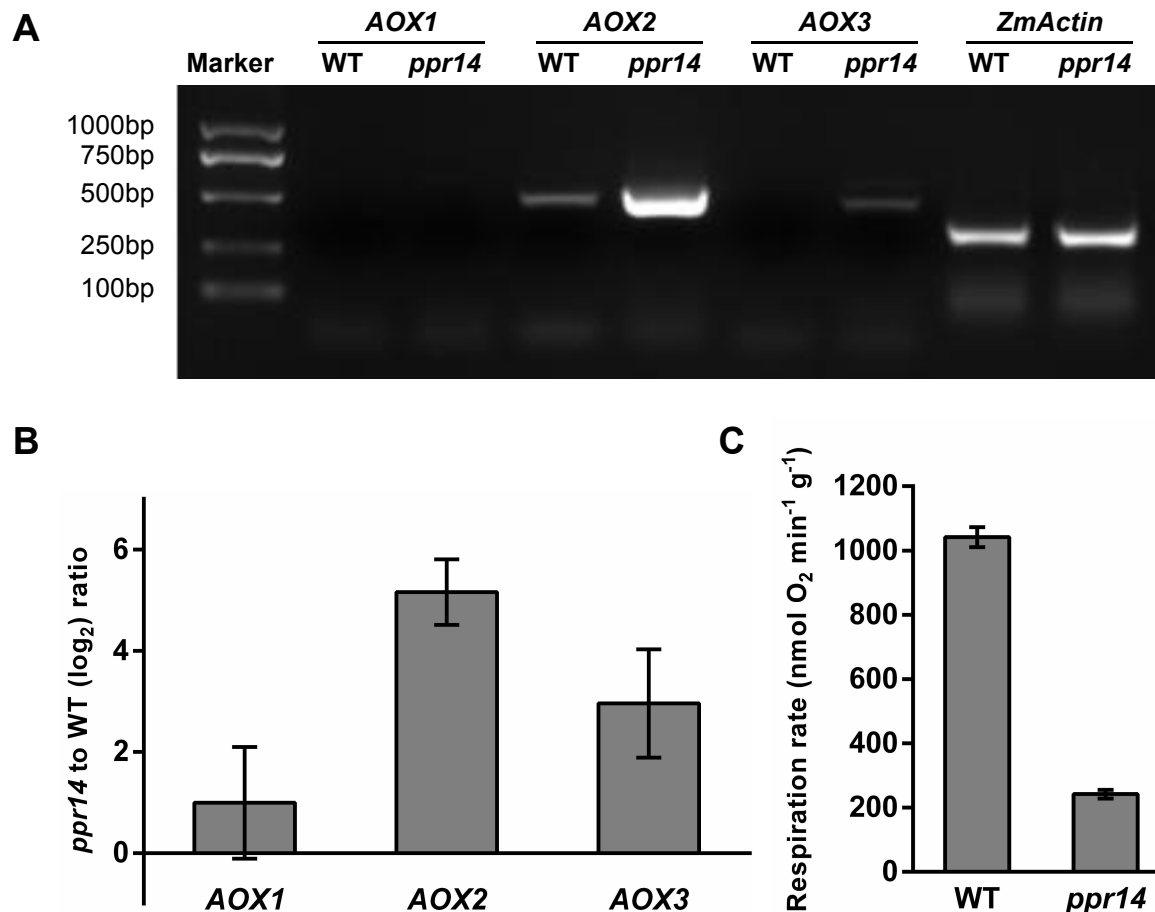

**Fig. S5.** *PPR14* mutation significantly increased *AOX2* gene expression and decreased respiration rate. (A) Semi-quantitative RT-PCR analysis of *AOX1*, *AOX2*, and *AOX3* gene expression in the wild-type (WT) and *ppr14-1* mutant kernels at 13 days after pollination (DAP). *ZmActin* was used to normalize the quantifications. (B) Real-time PCR analysis of *AOX1*, *AOX2*, and *AOX3* gene expression in the WT and *ppr14-1* mutant kernels at 13 DAP. *ZmEF1α* was used to normalize the quantifications. Values and error bars represent the mean and standard deviation of three biological replicates, respectively. (C) Respiration rate of wild-type (WT) and *ppr14-1* mutant kernels at 13 DAP.

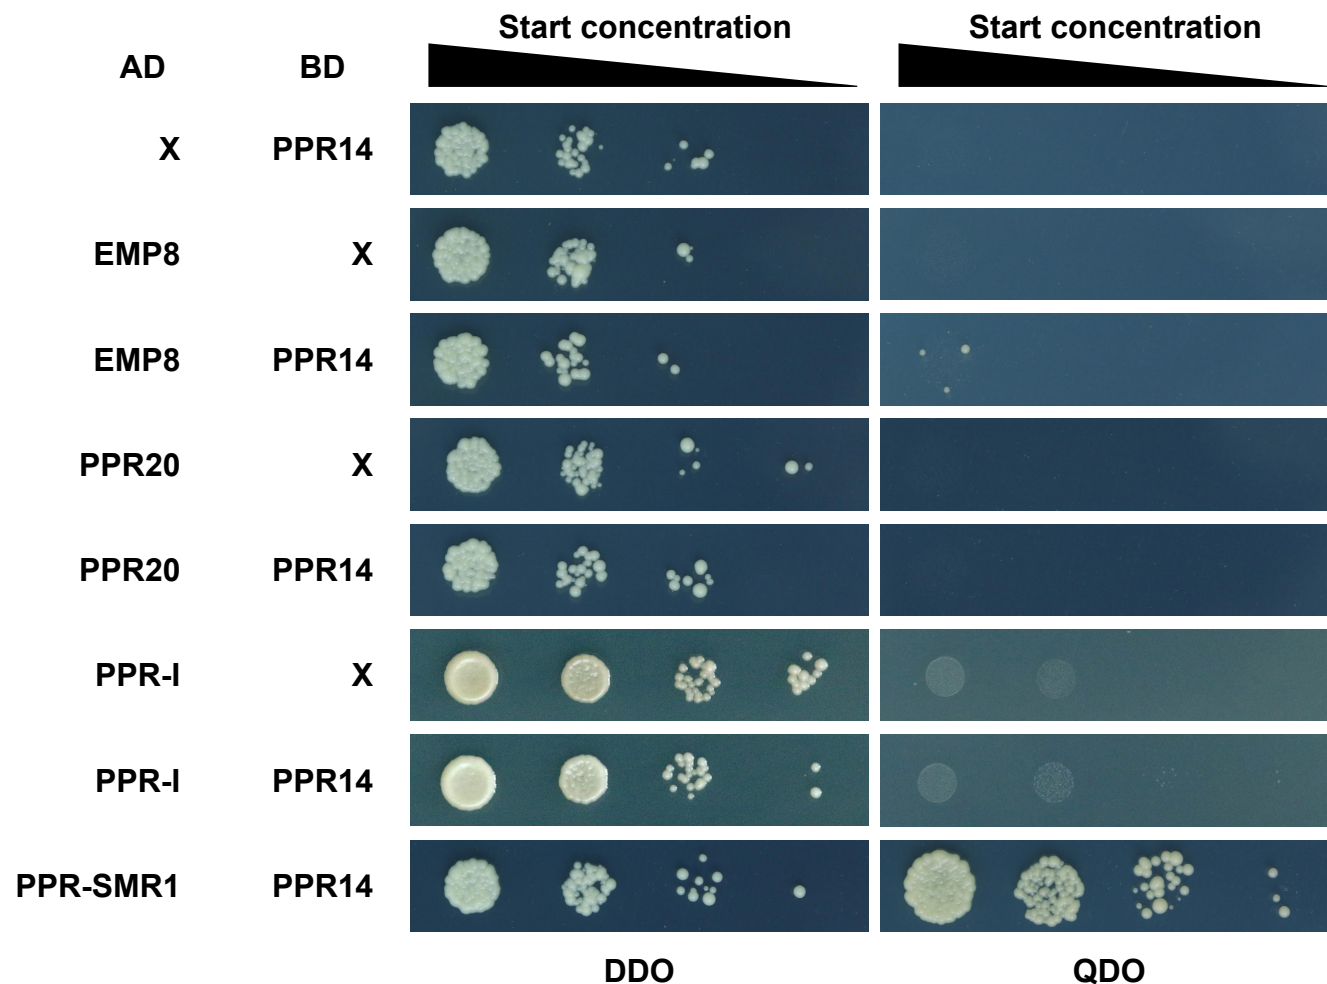

**Fig. S6.** PPR14 cannot interact with EMP8, PPR20, or PPR-I (GRMZM2G089959) in yeast two-hybrid system. The Y2HGold strain harboring the indicated bait and prey constructs were spotted on synthetic dropout (SD)/-Leu-Trp (without Leu and Trp; DDO) and SD/-Ade-Leu-Trp-His (without Ade, Leu, Trp, and His; QDO). Yeast cultures on DDO control plates prove the existence of both plasmids. Positive interactions were verified by growth on QDO plates.

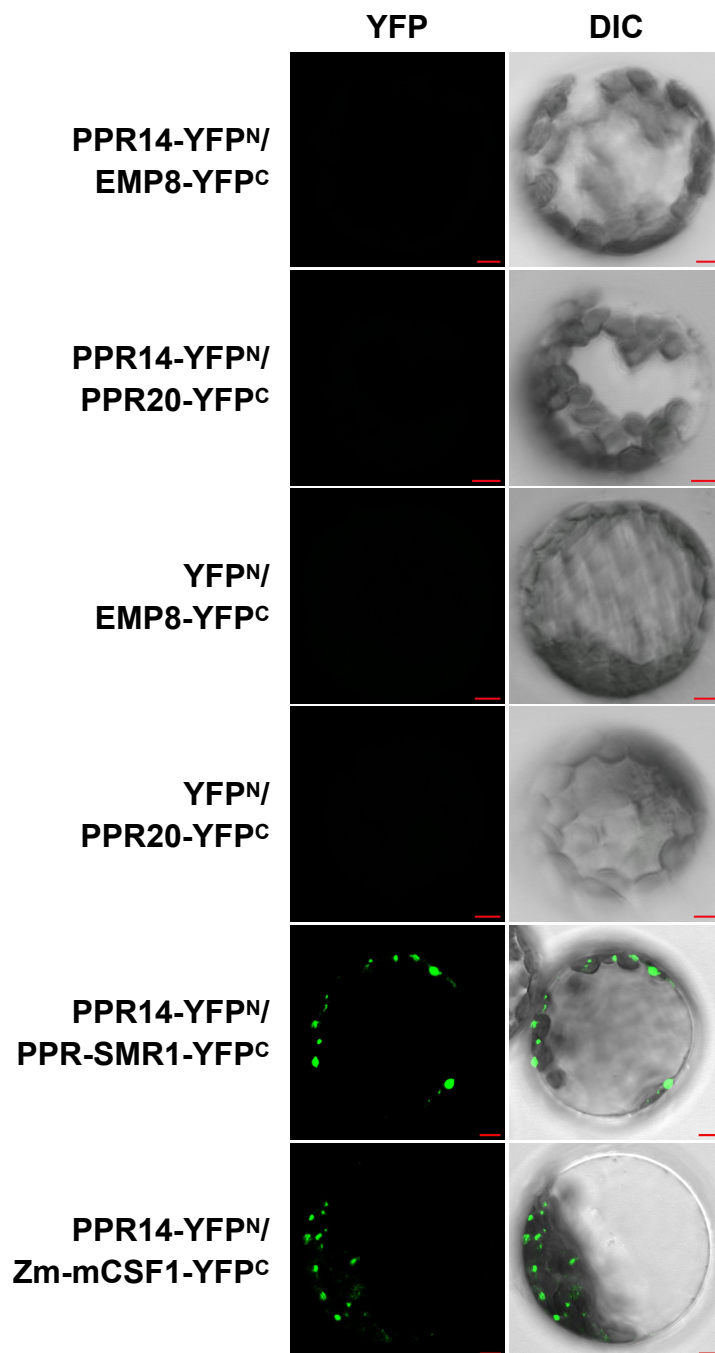

**Fig. S7.** PPR14 cannot interact with EMP8 or PPR20 in BiFC assay. Yellow fluorescent protein (YFP) is split into N-terminus (YFP<sup>N</sup>) and C-terminus (YFP<sup>C</sup>). PPR14 is fused with YFP<sup>N</sup>, EMP8 and PPR20 are fused with YFP<sup>C</sup>, respectively. The indicated combinations of -YFP<sup>N</sup> and -YFP<sup>C</sup> fusion proteins were transiently co-expressed in protoplasts of Arabidopsis leaves. Non-targeted YFP<sup>N</sup> was used as negative control. PPR-SMR1 and Zm-mCSF1 were used as positive controls. YFP signals were detected by a confocal laser microscope. Bars = 5  $\mu$ m.

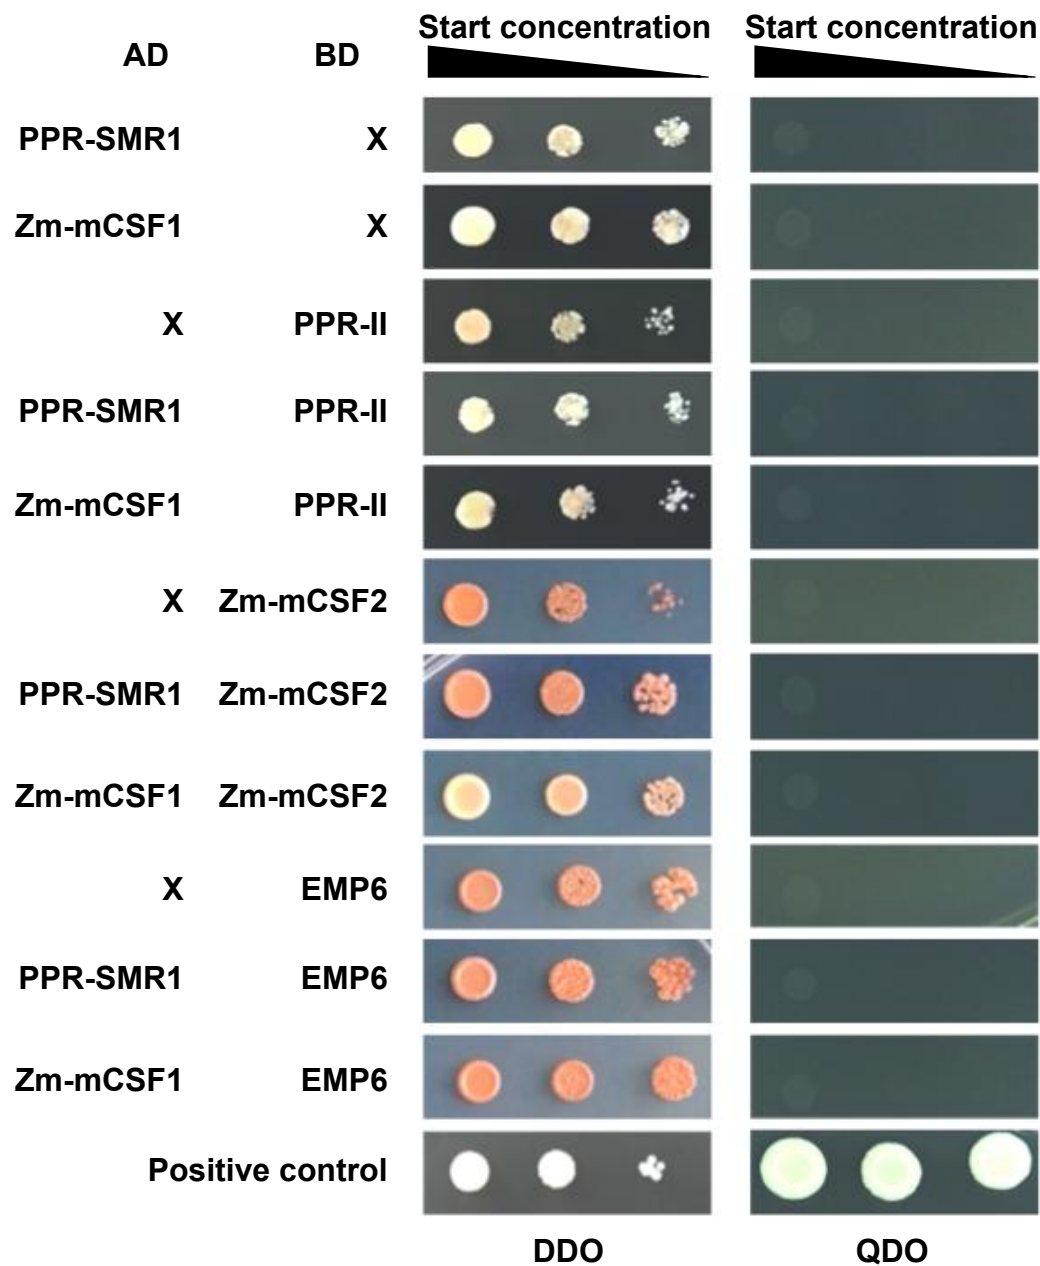

**Fig. S8.** PPR-SMR1 and Zm-mCSF1 cannot interact with PPR protein PPR-II (Zm00014a038761), CRM protein Zm-mCSF2 (GRMZM2G129615; homolog of Zm-mCSF1), or PORR protein EMP6 in yeast two-hybrid system. The Y2HGold strain harboring the indicated bait and prey constructs were spotted on synthetic dropout (SD)/-Leu-Trp (without Leu and Trp; DDO) and SD/-Ade-Leu-Trp-His (without Ade, Leu, Trp, and His; QDO). Yeast cultures on DDO control plates prove the existence of both plasmids. Positive interactions were verified by growth on QDO plates.



**Table S1.** Primers used in this study.

| Primer name   | Primer sequence (5' to 3') | Use                                                     |
|---------------|----------------------------|---------------------------------------------------------|
| 14-F1         | CCGAGGAGCTGCTATGGG         | PPR14 genotyping, RT-PCR                                |
| 14-R1         | CTCCAAATTGCCAAACCGGC       |                                                         |
| 14-F2         | CACCATGCGTCGCTACTGCCAC     | PPR14 genotyping                                        |
| TIR8a         | CGCCTCCATTTTCGTGCAATCCCCTS |                                                         |
| TIR8b         | CGCCTCCATTTTCGTGCAATCCSCTT |                                                         |
| TIR8c         | SGCCTCCATTTTCGTGCAATCCCKT  |                                                         |
| TIR8d         | CGCCTCCATTTTCGTGCAATCACCTC |                                                         |
| ZmActin-F1    | TAGTTGAGAATGGCTGACGAGG     | maize RNA normalization                                 |
| ZmActin-R1    | ATCTTCAGGCGAAACACGGAGC     |                                                         |
| 14-F3         | CACCATGCGTCGCTACTGCC       | Construct pENTR-PPR14 <sup>N301</sup> for localization  |
| 14-R2         | CTCTTGGAACAGTGCTATGCATTG   |                                                         |
| 14-F4         | ATTGCGGCCGCCCCCTTCACC      | Construct pENTR-PPR14 for localization                  |
| 14-R3         | TTGGCGCGCCACCCTTTTCAAACAG  |                                                         |
| nad2-1F       | TTTTAGCGGTTTCCCCAGAGA      | Test <i>nad2</i> intron 1 splicing efficiency by RT-PCR |
| nad2-1R       | GGCTTCCGTGGAAAATTCAGAC     |                                                         |
| nad2-2F       | TGGCGCACCTCTCCTAACTATT     | Test <i>nad2</i> intron 2 splicing efficiency by RT-PCR |
| nad2-2R       | CGAGCACCAAGTGATTTTCGTATC   |                                                         |
| nad2-3F       | CGGATACGAAATCACTGGTGCT     | Test <i>nad2</i> intron 3 splicing efficiency by RT-PCR |
| nad2-3R       | ACTATGGCGAATGCATCTATCG     |                                                         |
| nad2-4F       | CTATTGTTGCTTCTATGGGGG      | Test <i>nad2</i> intron 4 splicing efficiency by RT-PCR |
| nad2-4R       | GAACAAGGGAGAGGGATATGGA     |                                                         |
| nad7-1F       | CAGGTGGGACAAGCTCTAGG       | Test <i>nad7</i> intron 1 splicing efficiency by RT-PCR |
| nad7-1R       | CTCGATTAATTTCTCAGTCCCTC    |                                                         |
| nad7-2F       | GAGGGACTGAGAAATTAATCGAG    | Test <i>nad7</i> intron 2 splicing efficiency by RT-PCR |
| nad7-2R       | CTCGACATAAGCCAAGAGGC       |                                                         |
| nad7-3F       | GCCTCTTGGCTTATGTCGAG       | Test <i>nad7</i> intron 3 splicing efficiency by RT-PCR |
| nad7-3R       | CCGAACACTTTGTGCGCATCT      |                                                         |
| nad7-4F       | AGATGCGACAAAGTGTTCCGG      | Test <i>nad7</i> intron 4 splicing efficiency by RT-PCR |
| nad7-4R       | GTTTTGGCTCGCAATAAAGC       |                                                         |
| EF1α-F        | TCTCAAGAACGGTGATGCTG       | maize RNA normalization                                 |
| EF1α-R        | TGGGTCTTCTTCTCCACAC        |                                                         |
| nad1-int1F    | TGTCAGATCCGAACATAGGG       | Test spliced <i>nad1</i> exon1-2                        |
| nad1-int1R    | TGCAGATCGTAATGCTCCTAGA     |                                                         |
| nad1-exonF1   | TATGTTAAGTCTGGTCGCTTGGG    | Test unspliced <i>nad1</i> exon1-int1                   |
| nad1-intronR1 | TATATCATAGGCGACCGAACGG     |                                                         |
| nad1-int2F    | TGCAGCTCAAATGGTCTCTT       | Test spliced <i>nad1</i> exon2-3                        |
| nad1-int2R    | AATACGGGGAACAAGGGAAT       |                                                         |
| nad1-exonF2   | TCGAAATATGCCTTTCTAGGAG     | Test unspliced <i>nad1</i> exon2-int2                   |
| nad1-intronR2 | AAACTCAAAACGAGCCTTGCG      |                                                         |
| nad1-int3F    | ATTCCCTTGTTCCCCGTATT       | Test spliced <i>nad1</i> exon3-4                        |
| nad1-int3R    | AAAAGAGCAGACCCCATGGA       |                                                         |
| nad1-exonF3   | GTCATGGCGCAAAAGCAGATATGG   | Test unspliced <i>nad1</i> exon3-int3                   |
| nad1-intronR3 | GAATGAGTCCCGAGACATTGGC     |                                                         |
| nad1-int4F    | TCCCCGTATTGGTTATGTTCC      | Test spliced <i>nad1</i> exon4-5                        |
| nad1-int4R    | GATCATATTGGCATACTCTCCC     |                                                         |
| nad1-exonF4   | GGGAGAGTATGCCAATATGATCTTA  | Test unspliced <i>nad1</i> exon4-int4                   |
| nad1-intronR4 | GAGTCAAAGGGTCACCACTACTGAG  |                                                         |
| nad2-int1F    | AGTAATGTGGGTTGGCTTGG       | Test spliced <i>nad2</i> exon1-2                        |
| nad2-int1R    | GAAATGGTACCAGCCGTACTT      |                                                         |
| nad2-exonF1   | GCGGTTTCCCCAGAGATCTTTC     | Test unspliced <i>nad2</i> exon1-int1                   |
| nad2-intronR1 | TACGATTAGCCAGCCTTGCGGC     |                                                         |
| nad2-int2F    | TCGCAGCATCAAAAAGAAAG       | Test spliced <i>nad2</i> exon2-3                        |

|               |                            |                                       |
|---------------|----------------------------|---------------------------------------|
| nad2-int2R    | GATCGAAGTGGGTAGCTCCA       | Test spliced <i>nad2</i> exon2-3      |
| nad2-exonF2   | TGATCTTAGGTGCATTTCCCTCTG   | Test unspliced <i>nad2</i> exon2-int2 |
| nad2-intronR2 | ATCGGTAGTAGTCCGGTCGCAC     |                                       |
| nad2-int3F    | ACCGGATACGAAATCACTGG       | Test spliced <i>nad2</i> exon3-4      |
| nad2-int3R    | GCGCAATAGAAAGGAATGCT       |                                       |
| nad2-exonF3   | TCTACTGGAGCTACCCACTTCGA    | Test unspliced <i>nad2</i> exon3-int3 |
| nad2-intronR3 | AGCGGTACCACCCATCCTACC      |                                       |
| nad2-int4F    | GGTTGTGGGGCTTACTTCCT       | Test spliced <i>nad2</i> exon4-5      |
| nad2-int4R    | CGACTTGTCACGATCCATTG       |                                       |
| nad2-exonF4   | TTCCAGCATTACGGCAAACC       | Test unspliced <i>nad2</i> exon4-int4 |
| nad2-intronR4 | TACTCATGGCAACCTTCCGGC      |                                       |
| nad4-int1F    | GGTGGTTCTGTTTGGAGAA        | Test spliced <i>nad4</i> exon1-2      |
| nad4-int1R    | AGCGTGCCAATCCCTATGT        |                                       |
| nad4-exonF1   | ATGATCGCCGTGTCCTGCATGC     | Test unspliced <i>nad4</i> exon1-int1 |
| nad4-intronR1 | AAGCTTCGCGGGGACCTTGAC      |                                       |
| nad4-int2F    | GAAGATCATTGCCTACTCCTCA     | Test spliced <i>nad4</i> exon2-3      |
| nad4-int2R    | AGGGCTGAAGAAACCAGTCC       |                                       |
| nad4-exonF2   | CAGTAGCCCATATGAATTTGGTG    | Test unspliced <i>nad4</i> exon2-int2 |
| nad4-intronR2 | CGCTAAGGGGTTTTGTTTTAGG     |                                       |
| nad4-int3F    | GTGAACACCCATCCGAACA        | Test spliced <i>nad4</i> exon3-4      |
| nad4-int3R    | GGCGTATTCCCTTTGGCTAT       |                                       |
| nad4-exonF3   | TACCCGGCACTAGCAGCTTTATC    | Test unspliced <i>nad4</i> exon3-int3 |
| nad4-intronR3 | CCCATCGCAAGCACCTACAATG     |                                       |
| nad5-int1F    | CCATGGATCTCATCGGAAAT       | Test spliced <i>nad5</i> exon1-2      |
| nad5-int1R    | CACATAAATCGAGGGCTATGC      |                                       |
| nad5-exonF1   | ATCTCAGAATAGCTCCATGGATCTC  | Test unspliced <i>nad5</i> exon1-int1 |
| nad5-intronR1 | CGGGAGTTGTTACGTCCAGTATG    |                                       |
| nad5-int2F    | TTTGCTTTCTGGTTGGGAAG       | Test spliced <i>nad5</i> exon2-3      |
| nad5-int2R    | TCATATCTTTGGCCAAGTATCCTAC  |                                       |
| nad5-exonF2   | AGAGCTCGCTTACACAAAGTATACC  | Test unspliced <i>nad5</i> exon2-int2 |
| nad5-intronR2 | TACTTACTTATGGGCTAACAGGTCAC |                                       |
| nad5-int3F    | GATTGGTTTAGGTACAATTTTGG    | Test spliced <i>nad5</i> exon3-4      |
| nad5-int3R    | TTTGAAAGGCTCGTTGGAAT       |                                       |
| nad5-exonF3   | GATATGATGATTGGTTTAGGT      | Test unspliced <i>nad5</i> exon3-int3 |
| nad5-intronR3 | TTTTCTCAGTTGCAGGGTTTG      |                                       |
| nad5-int4F    | CGTACACATTCCGACGATTG       | Test spliced <i>nad5</i> exon4-5      |
| nad5-int4R    | CCCACATACGAGAAAAGGTCA      |                                       |
| nad5-exonF4   | AAGGGTGCTATTGAGATATTGGG    | Test unspliced <i>nad5</i> exon4-int4 |
| nad5-intronR4 | CTTTCCTCGGGTTCGTAGAGTC     |                                       |
| nad7-int1F    | CGGGCAAATCAAGAATTTCA       | Test spliced <i>nad7</i> exon1-2      |
| nad7-int1R    | CTCGATTAATTTCTCAGTCCCTCT   |                                       |
| nad7-intronF1 | GGATTTGCGAATGAATGCTG       | Test unspliced <i>nad7</i> int1-exon2 |
| nad7-exonR2   | CTCGATTAATTTCTCAGTCCCTC    |                                       |
| nad7-int2F    | TCAAGCTTTACCTATTTTGATCG    | Test spliced <i>nad7</i> exon2-3      |
| nad7-int2R    | TGATGCTCCACATCCATAG        |                                       |
| nad7-intronF2 | GTTGTTTCGTTCCGTCGTTGA      | Test unspliced <i>nad7</i> int2-exon3 |
| nad7-exonR3   | CTCGACATAAGCCAAGAGGC       |                                       |
| nad7-int3F    | GATTGGGGATTCAAGTGGTGT      | Test spliced <i>nad7</i> exon3-4      |
| nad7-int3R    | CGAACACTTTGTGCGATCTC       |                                       |
| nad7-exonF3   | GCCTCTTGGCTTATGTGAGATA     | Test unspliced <i>nad7</i> exon3-int3 |
| nad7-intronR3 | ATGGGAACCTCCCCATATTGC      |                                       |
| nad7-int4F    | CCATCACGATCTCGAATGAA       | Test spliced <i>nad7</i> exon4-5      |
| nad7-int4R    | TAGGTGCTTCAACTGCGGTA       |                                       |
| nad7-exonF4   | AGATGCGACAAAGTGTTCCGAT     | Test unspliced <i>nad7</i> exon4-int4 |
| nad7-intronR4 | TTTACTCCTAACCCACGACGG      |                                       |

|                 |                                               |                                        |
|-----------------|-----------------------------------------------|----------------------------------------|
| ccmFc-F2        | TTATTTTCGTTTCGTTCCCGTTC                       | Test spliced <i>ccmFc</i> exon1-2      |
| ccmFc-R2        | TGTTCAAACATGAACCTTTTCGC                       |                                        |
| ccmFc-exonF1    | CGACTGTTGATGGCTGTTGGTC                        | Test unspliced <i>ccmFc</i> exon1-int1 |
| ccmFc-intronR1  | GTCAACTGAGCATCTCAGCGGC                        |                                        |
| cox2-int1F      | CTCAATGGACGGGGTATTAG                          | Test spliced <i>cox2</i> exon1-2       |
| cox2-int1R      | CACAAAGAGCGATTGTGAGG                          |                                        |
| cox2-exonF1     | AGCTATTGGACATCAATGGTATCG                      | Test unspliced <i>cox2</i> exon1-int1  |
| cox2-intronR1   | CGGGGTATAGGTCTAACCACCTC                       |                                        |
| rps3-sense      | CAGATCCAAGTCGGTTCACTGA                        | Test spliced <i>rps3</i> exon1-2       |
| rps3-antisense2 | AGTCTCGTAGGTGGACGTATCG                        |                                        |
| rps3-exonF1     | TTTCGGTAAGACTTGATCTGAATCG                     | Test unspliced <i>rps3</i> exon1-int1  |
| rps3-intronR1   | CTTTCACGACATGCTCTGGTCC                        |                                        |
| 14-F5           | CATATGAGCCCGTACGCCTCC                         | Construct Y2H vectors of PPR14         |
| 14-R4           | CGGATCCCTCATCATCAAACAGTG                      |                                        |
| 14-R5           | GCGGATCCCAGGAGGTGCTGCG                        |                                        |
| 14-F6           | CGCCATATGAGCTGCTACGTCTCCC                     |                                        |
| 14-F7           | GCGGATCCATGCGTCGCTACTG                        | clone PPR14 to pUC-SPYNE vector        |
| 14-R6           | CCGCTCGAGTTCAAACAGTGTTTG                      |                                        |
| 14-F8           | CGCGGATCCATCTCCCTTGTCCTC                      | Construct MBP-PPR14-His vector         |
| 14-R7           | GCGTCGACTCAATGATGGTGATGGTGATGTTCAAACAGTGTTTG  |                                        |
| 91y2b-F SmaI    | CCCGGGGGAGTGACGGACACGGTG                      | Construct Y2H vectors of PPR-SMR1      |
| 91CDS-R Sall    | CGTCGACTCACCTAGGCATGCCAAGGG                   |                                        |
| 91NE-R BamHI    | TGGATCCGGGGAAGGTGGCGAGGT                      |                                        |
| 91P-F EcoRI     | TGAATTCAAGACCTTCAACGCCGTC                     |                                        |
| 91P-R BamHI     | TGGATCCTGCCTTGGCGAACAGCTTAT                   |                                        |
| 91CDS-F BamHI   | CGGATCCATGCTGCTCCGCGTTGGC                     | clone PPR-SMR1 to pUC-SPYCE vector     |
| PPR-SMR1R3      | GGCCGACGTCGACCCTAGGCATGCCAAGGG                |                                        |
| 91CP-F BamHI    | GGATCCGAGTGGACGGACACGGTG                      | Construct MBP-PPR-SMR1-His vector      |
| 91CH-R Sall     | GTCGACTTAGTGTTGGTGGTGGTGGTGCCTAGGCATGCCAAGGGA |                                        |
| CSFy2b-F1 EcoRI | GAATTCTACGGCTTCGTGGCCC                        | Construct Y2H vectors of Zm-mCSF1      |
| CSFy2b-R1 BamHI | GGATCCCTAAATTACTTTTGTAATTTGGCAC               |                                        |
| mCNE-R BamHI    | TGGATCCCAGTACCCGCTCCCGCT                      |                                        |
| mCRM-F EcoRI    | TGAATTCGGAGAGCCTCTCACCCC                      |                                        |
| mCRM-R BamHI    | TGGATCCATTTCCCTCCAAACAATGA                    |                                        |
| mCCE-F EcoRI    | TGAATTCGAAGATGGGAGCCTACAAG                    |                                        |
| mC-F BamHI      | AGGATCCATGCTCACCCCTCCCGGT                     | clone Zm-mCSF1 to pUC-SPYCE vector     |
| mC-RNS XhoI     | ACTCGAGAATTACTTTTGTAATTTGGCAC                 |                                        |
